# Supplementary material for: RNA inhibitors of nuclear proteins responsible for multiple organ dysfunction syndrome
Source: PubMed Central journal article supplement (PMC6328615; doi:10.1038/s41467-018-08030-y), 2019-01-10
Supplement: 41467_2018_8030_MOESM2_ESM.pdf [file 41467_2018_8030_MOESM2_ESM.pdf]

## Supplementary Information

RNA inhibitors of nuclear proteins responsible for multiple organ dysfunction syndrome.  
Urak et al.

## **Supplementary Methods**

### **Platelet Aggregation assay.**

Washed platelets were prepared as described in the Methods section. Platelets were re-suspended in Tyrode buffer to a final concentration of  $2.5 \times 10^8$  platelets per mL. For the platelet aggregation studies, 400  $\mu$ l of washed platelets were stirred at 37 °C with either collagen ( $1 \mu\text{g mL}^{-1}$ ), histone H4 ( $10 \mu\text{g mL}^{-1}$ ), selected RNA rounds ( $15 \mu\text{g mL}^{-1}$ ) in a cuvette of an aggregometer (Chrono-log Model 560-VS) and light transmittance was recorded. Aggregation was measured as percent change in light transmission, where 100 % refers to transmittance through blank solution.

### **TLR activation studies.**

EA.Hy926 cells were seeded in a 96-well flat bottom plate at a density of 15,000 cells per well in 100  $\mu$ l of media. After 24 h the medium was removed and replaced with 100  $\mu$ l of Opti-MEM containing either calf thymus histones (CTH) at varying concentrations or LPS ( $50 \mu\text{g mL}^{-1}$ ) with or without Aptamers KU7 and KU9 ( $50 \mu\text{g mL}^{-1}$ ). After 24 h, the supernatant was collected, processed and quantified according to manufacturer's protocol in the human interleukine-6 (IL-6) Quantikine® ELISA kit (R&D Systems, Minneapolis, MN).

### **Double-filter binding assay.**

Double-filter nitrocellulose binding assay was preformed to determine the binding affinity ( $K_D$ ) of the aptamers for their target. Synthetic aptamers (KU7 and KU9) were radiolabeled with gamma- $^{32}\text{P}$ -ATP using T4 polynucleotide kinase (PNK) as follows: A total reaction volume of 20  $\mu$ L was made up of 20 pmol of aptamer RNA, 2  $\mu$ L PNK (New England Biolabs, Ipswich, MA), 2  $\mu$ L PNK reaction buffer (New England Biolabs, Ipswich, MA), 2  $\mu$ L gamma- $^{32}\text{P}$ -ATP (PerkinElmer, Waltham, MA), and  $\text{dH}_2\text{O}$ . The mixture was incubated at 37 °C for 30 min and 65 °C for 20 min to heat inactivate the PNK. 20  $\mu$ L of 1 $\times$  BB was added to the reaction followed

by a centrifugation step through a G25 purification column (GE Healthcare, Little Chalfont, United Kingdom, IL) according to manufactures instructions. Labeling efficiency was determined by a scintillation counter. All radiolabeled RNAs were diluted in 1× BB to 2,000 cpm per mL. 5 µL of 2,000 cpm per mL radiolabeled RNA was incubated at 37 °C for 5, 50, and 100 mins respectively with 15 µL of either human histone H4 serially diluted in 1× BB. The binding reactions were loaded onto a dot blot apparatus (composed of nitrocellulose membrane on the top, nylon membrane (Sigma-Aldrich, St. Louis, MO) in the middle and Whatman paper (Sigma-Aldrich, St. Louis, MO) on the bottom). Treatment of the nitrocellulose membrane was as follows: pretreated with 0.5 M KOH (Sigma-Aldrich, St. Louis, MO) for 20 min, quick wash with diH<sub>2</sub>O, and equilibrated in 0.1 M Tris HCl 7.5 for 45 min, washed with diH<sub>2</sub>O, and transferred to 1× BB for 20 min before I (Sigma-Aldrich, St. Louis, MO). The nylon was also incubated in 1× BB for 20 min before being loaded on the manifold. Before loading the RNA/protein samples, the wells were washed with 100 µL of 1× BB. The amount of RNA bound (nitrocellulose) versus unbound (nylon) was determined by densitometry of imaged membrane on a Fuji Phosphor imager.

# Supplementary Figure 1

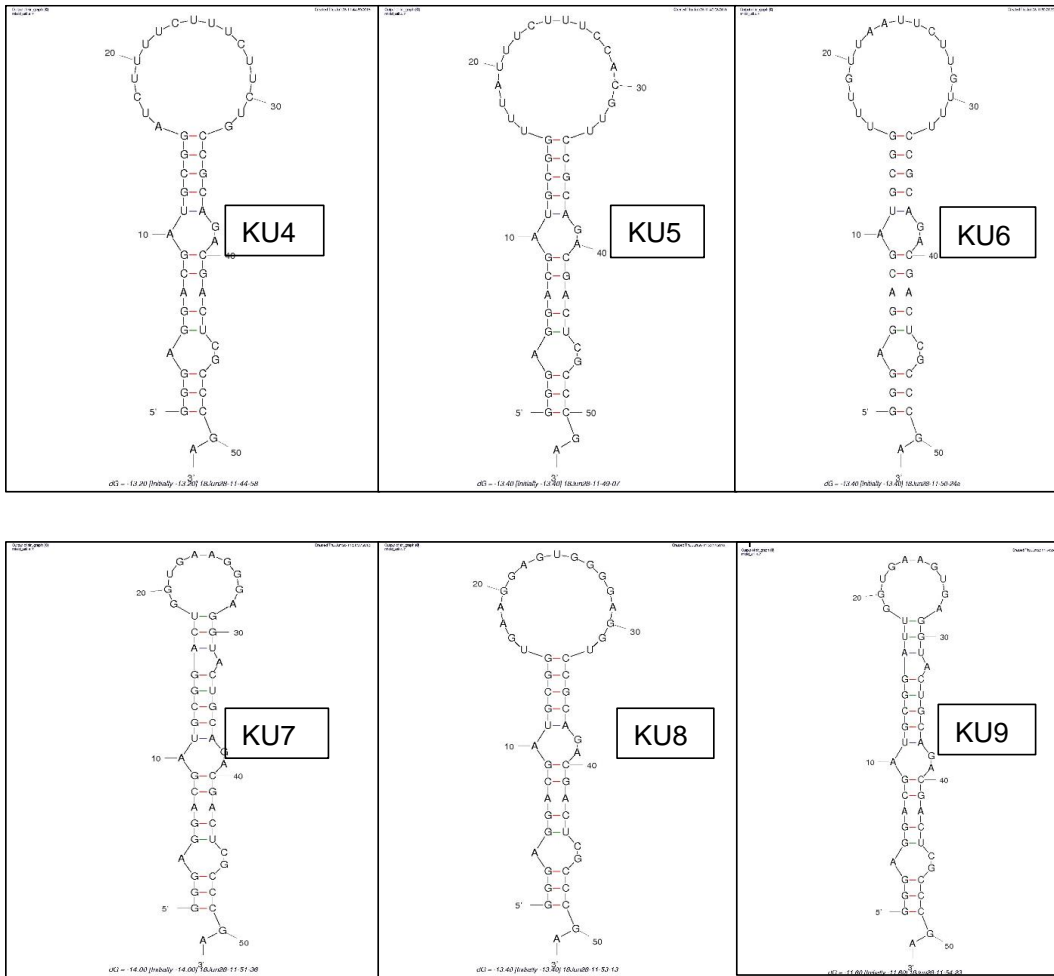

**Supplementary Figure 1. Theoretical secondary RNA structures for the top 6 histone aptamers.**

Secondary RNA structures for histone aptamers KU4 – KU9 predicted using Mfold.

## Supplementary Figure 2

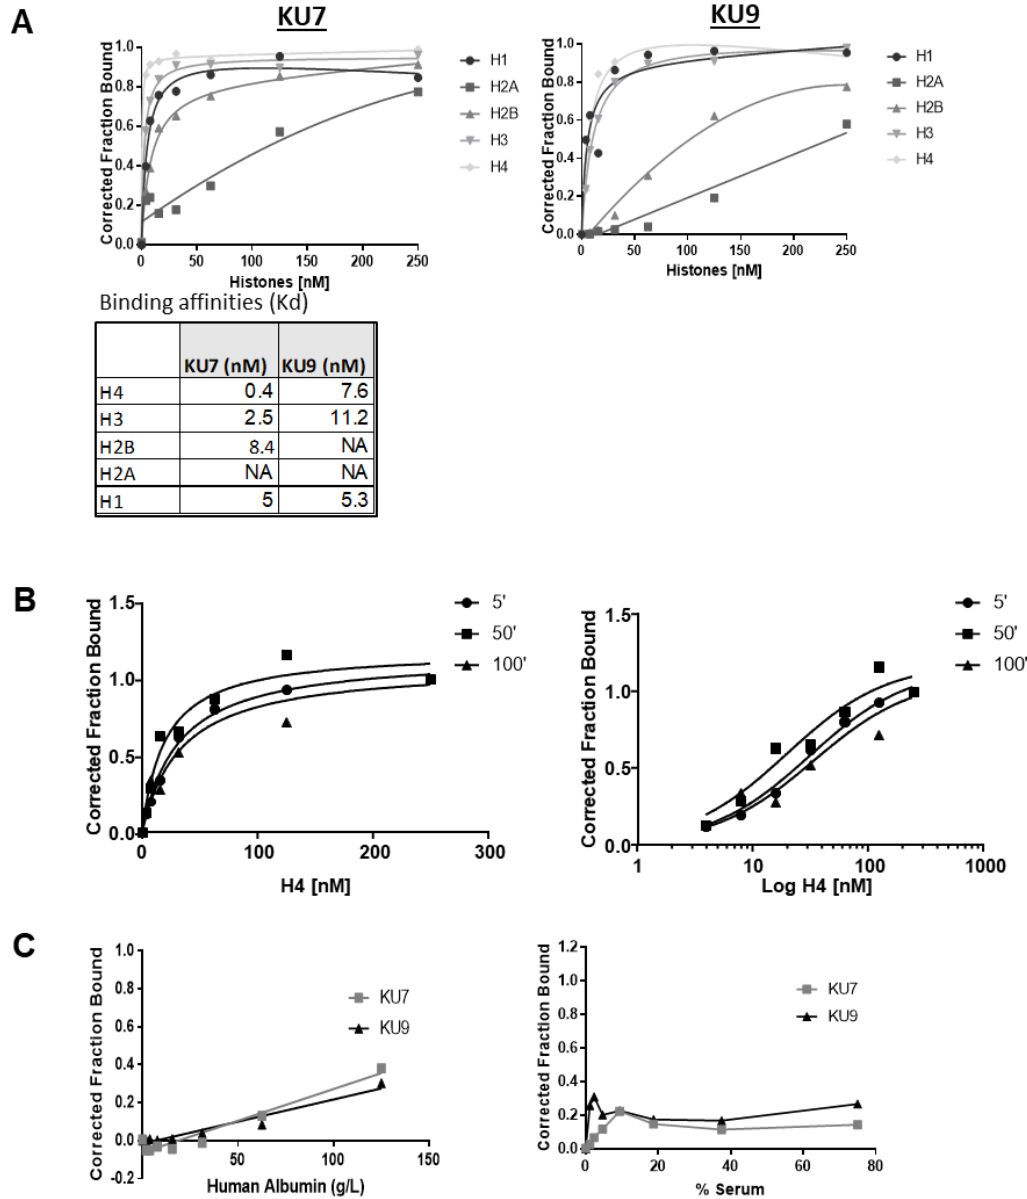

**Supplementary Figure 2. Sensitivity and specificity for selected RNA aptamers. A)** Binding of KU7 (left panel) and KU9 (right panel) to recombinant histones H1, H2A, H2B, H3 and H4. Binding constants are listed in table (bottom). **B)** Binding of KU7 to H4 histones (middle, left and right panel) at 5, 50 and 100 mins to determine equilibrium binding time. **C)** Binding of selected RNA aptamers KU7 and KU9 human serum albumin (lower, left panel) and to serum (lower, right panel).

### Supplementary Figure 3

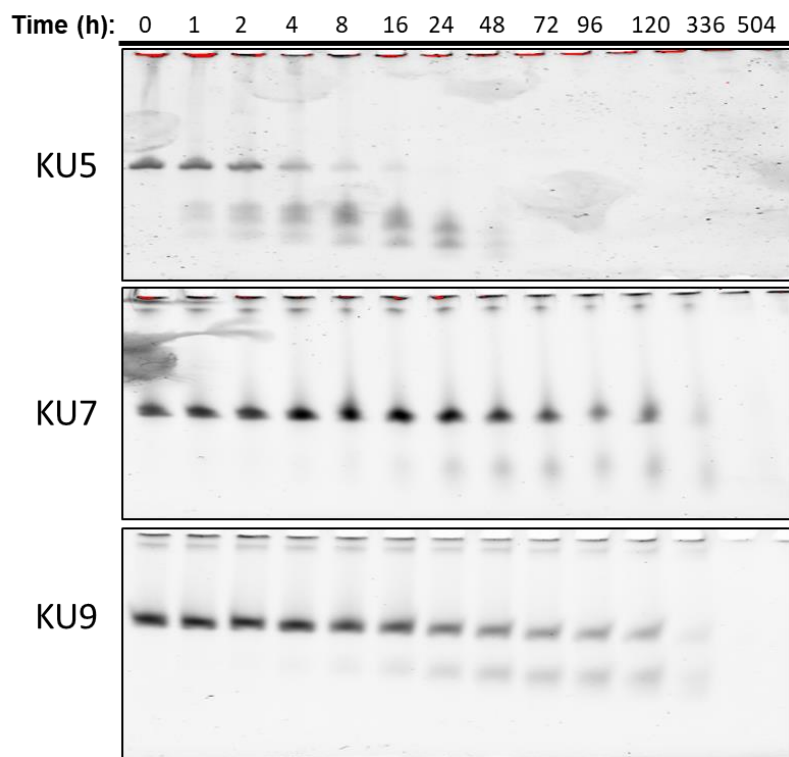

### Supplementary Figure 3. Stability measurements of individual histone RNA aptamer sequences

Full-sized 8M urea gels of the aptamers highlighting the degradation or stability of each aptamer.

## Supplementary Figure 4

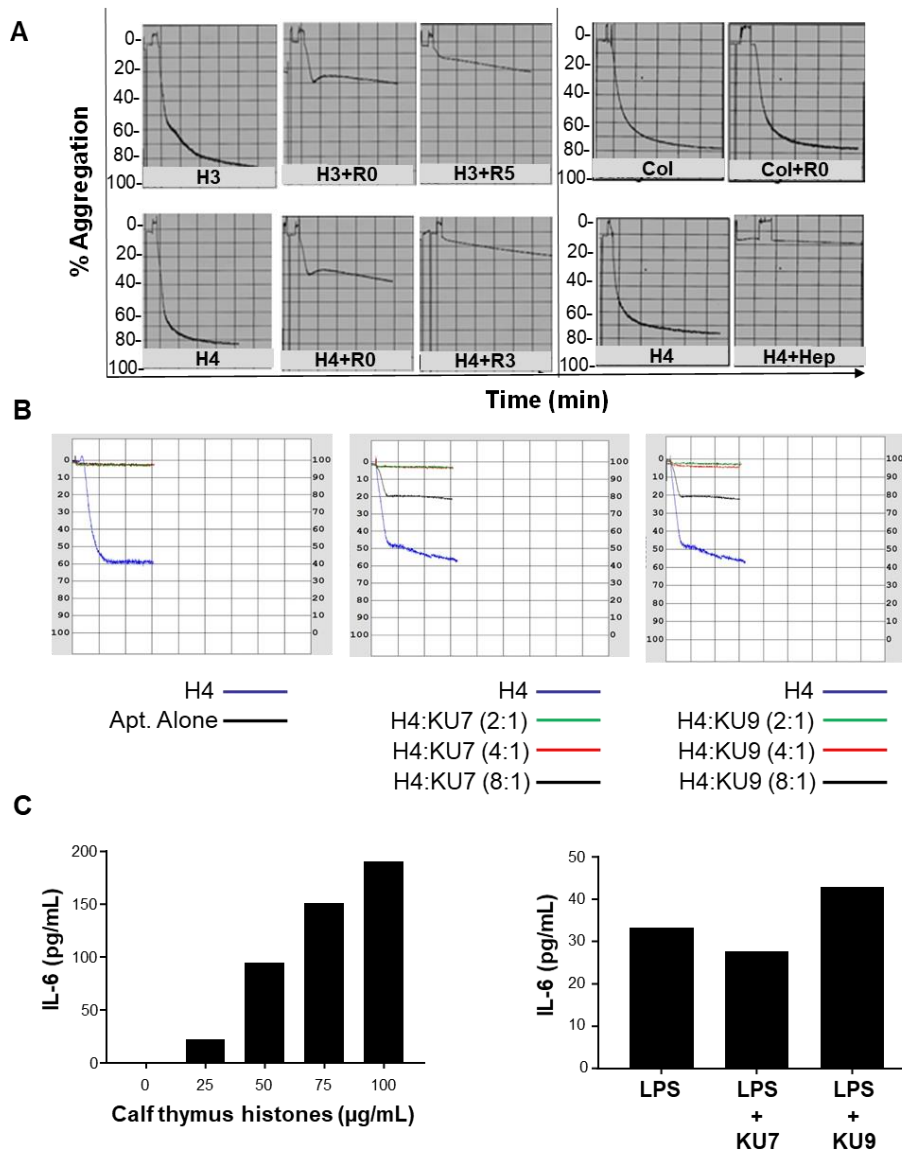

### Supplementary Figure 4. *In vitro* efficacy of RNA aptamers. **A)** Human platelet aggregation.

Collagen (Col), human histones (H3 and H4), Round 0 RNA (R0), Round 3 RNA (R3), Round 5 RNA (R5), heparin (Hep). Platelets derived from 3 independent healthy donors. **B)** Platelets were treated with 10  $\mu\text{g/mL}$  of histone H4 alone (blue) or 10  $\mu\text{g/mL}$  aptamers alone (black). Platelets were treated with 10  $\mu\text{g/mL}$  of histone H4 alone (blue) or histone plus varying amounts of RNA aptamer KU7 (middle panel) or KU9 (right panel).

**C)** TLR activation. IL-6 protein levels in supernatants of EA.Hy926 cells treated with various amounts (0 to 100  $\mu\text{g/mL}$ ) of CTH (left panel) or LPS (50  $\mu\text{g mL}^{-1}$ ) plus aptamers KU7 or KU9 (50  $\mu\text{g mL}^{-1}$ ).

## Supplementary Figure 5

### Liver

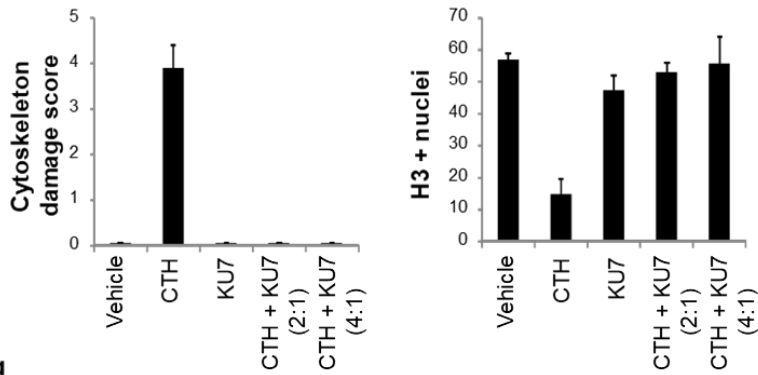

### Lung

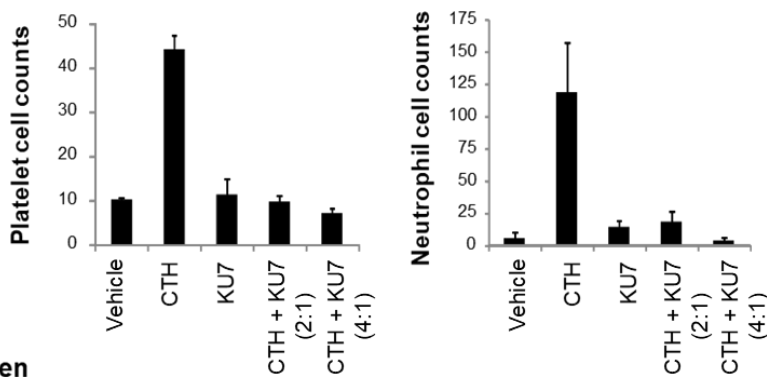

### Spleen

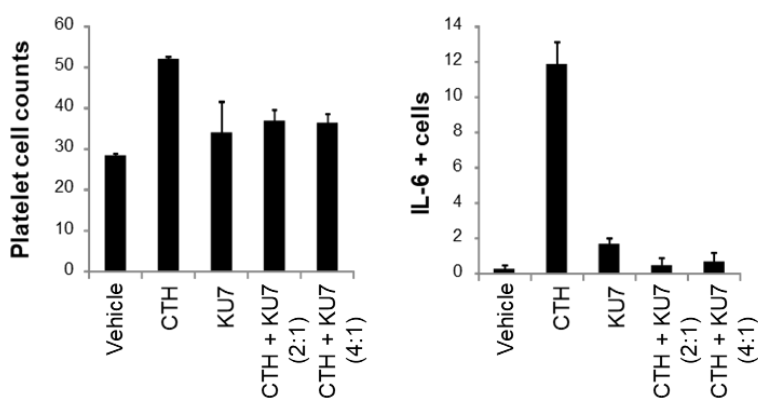

**Supplementary Figure 5. Efficacy of histone aptamer in murine model of MODS.** Quantitative analyses of immunostaining of mouse liver (top panels), lung (middle panels) and spleen (bottom panels) tissues. Bars represent mean values of 2-4 mice (each mouse estimated from 4-5 independent confocal images taken at 20x magnification with 2x zoom, using the image analysis program, NIH ImageJ). Cytoskeleton damage score (liver) was assigned a score from 0 to 5 (no damage = 0, most severe = 5). Platelet cell counts (lung and spleen) represent mean optical density measurements. Error bars = standard deviation of 2-4 mice (each mouse estimated from 4-5 independent confocal images).



## Supplementary Table 1. Histone selection protocol

|                                                                     | Round | Ratio of Protein:RNA | RNA (pmol) | Protein (pmol) | [Protein] (nM) | Binding Reaction Volume (mL) | Binding Time                           | [NaCl] (mM) | Pre-Clear conditions | Pre-Clear Time                             | Washes (10mL) |
|---------------------------------------------------------------------|-------|----------------------|------------|----------------|----------------|------------------------------|----------------------------------------|-------------|----------------------|--------------------------------------------|---------------|
| Positive Selection (Histones) and Negative Selection (hlgG and BSA) | 1     | 1:10                 | 1000       | 100            | 10             | 10                           | 10 min in solution<br>10 min with disk | 150         | hlgG                 | 20 min in solution<br>20 min with disk     | 3 x 5 min     |
|                                                                     | 2     | 1:10                 | 1000       | 100            | 10             | 10                           | 5 min in solution<br>5 min with disk   | 150         | hlgG                 | 20 min in solution<br>20 min with disk     | 3 x 10 min    |
|                                                                     | 3     | 1:20                 | 1000       | 50             | 5              | 10                           | 5 min in solution<br>5 min with disk   | 150         | hlgG                 | 20 min in solution<br>20 min with disk     | 3 x 10 min    |
|                                                                     | 4     | 1:40                 | 2000       | 50             | 5              | 10                           | 5 min in solution<br>5 min with disk   | 150         | hlgG + BSA           | 10 min in solution<br>10 min with disk     | 3 x 10 min    |
|                                                                     | 5     | 1:40                 | 2000       | 25             | 5              | 10                           | 5 min in solution<br>5 min with disk   | 150         | hlgG + BSA           | 10 min in solution<br>3 x 10 min with disk | 3 x 15 min    |
|                                                                     | 6     | 1:80                 | 2000       | 25             | 5              | 5                            | 5 min in solution<br>5 min with disk   | 150         | hlgG + BSA           | 10 min in solution<br>10 min with disk     | 3 x 30 min    |
| Negative Selection (hlgG and BSA)                                   | 7     | -                    | -          | -              | -              | -                            | -                                      | 150         | hlgG + BSA           | 10 min in solution<br>3 x 10 min with disk | -             |
|                                                                     | 8     | -                    | -          | -              | -              | -                            | -                                      | 150         | hlgG + BSA           | 10 min in solution<br>3 x 10 min with disk | -             |

## Supplementary Table 2. Affinity measurements

|                | Histone H3<br>(nM) | Histone H4<br>(nM) | CTH<br>(nM) | Human<br>Albumin | Human<br>Serum |
|----------------|--------------------|--------------------|-------------|------------------|----------------|
| <b>Round 0</b> | 4.221              | 1.963              | -           |                  |                |
| <b>Round 8</b> | 1.306              | 1.038              | -           | N/A              | N/A            |
| <b>KU7</b>     | 0.3117             | 0.68               | 4.109       | N/A              | N/A            |
| <b>KU9</b>     | 5.239              | 0.8575             | 12.46       | N/A              | N/A            |

### Supplementary Table 3. Top aptamer sequences from histone selection

| Original name | name | sequence                                             | Fold enrichment (R3:5) | Fold enrichment (6:8) |
|---------------|------|------------------------------------------------------|------------------------|-----------------------|
| 0081_H4       | KU4  | GGGAGGACGAUGCGGAUCUUUUCUUUCUUCUGCCGCAGACGACUCGCCCGA  | 9.704                  | 0.47                  |
| 0065_H4       | KU5  | GGGAGGACGAUGCGGUUUAUUUCUUUCCACGUUCCGCAGACGACUCGCCCGA | 9.699                  | 0.47                  |
| 0120_H4       | KU6  | GGGAGGACGAUGCGGUUUGUUAAUUCUUGUUUCCGCAGACGACUCGCCCGA  | 9.22                   | 0.23                  |
| 0145_H32      | KU7  | GGGAGGACGAUGCGGACUGGUGAAGGGAGGUACUGCAGACGACUCGCCCGA  | 6.91                   | 2.22                  |
| 0236_H32      | KU8  | GGGAGGACGAUGCGGUGAAGGAGUGGGGAGGUCCGCAGACGACUCGCCCGA  | 6.74                   | 1.3                   |
| 0243_H32      | KU9  | GGGAGGACGAUGCGGAUUGGUGAAGUGAGGUACUGCAGACGACUCGCCCGA  | 6.58                   | 0.6                   |

## Supplementary Table 4. Next-generation sequencing (NGS) primers

| Illumina primers with Barcode | sequence                                                                                                    |
|-------------------------------|-------------------------------------------------------------------------------------------------------------|
| BC01                          | AAT GAT ACG GCG ACC ACC GAG ATC TAC ACT CTT TCC CTA CAC GAC GCT CTT CCG ATC TAA GAA GAA GGG AGG ACG ATG CGG |
| BC02                          | AAT GAT ACG GCG ACC ACC GAG ATC TAC ACT CTT TCC CTA CAC GAC GCT CTT CCG ATC TGG CAA GAA GGG AGG ACG ATG CGG |
| BC03                          | AAT GAT ACG GCG ACC ACC GAG ATC TAC ACT CTT TCC CTA CAC GAC GCT CTT CCG ATC TCC TAA GAA GGG AGG ACG ATG CGG |
| BC04                          | AAT GAT ACG GCG ACC ACC GAG ATC TAC ACT CTT TCC CTA CAC GAC GCT CTT CCG ATC TCG AGA GAA GGG AGG ACG ATG CGG |
| BC05                          | AAT GAT ACG GCG ACC ACC GAG ATC TAC ACT CTT TCC CTA CAC GAC GCT CTT CCG ATC TGT GGA GAA GGG AGG ACG ATG CGG |
| BC06                          | AAT GAT ACG GCG ACC ACC GAG ATC TAC ACT CTT TCC CTA CAC GAC GCT CTT CCG ATC TTA CGA GAA GGG AGG ACG ATG CGG |
| BC07                          | AAT GAT ACG GCG ACC ACC GAG ATC TAC ACT CTT TCC CTA CAC GAC GCT CTT CCG ATC TAT CCA GAA GGG AGG ACG ATG CGG |
